# Supplementary material
Source: PubMed Central journal article supplement (PMC3273727)
Supplement: NIHMS348507-supplement-02.pdf [file NIHMS348507-supplement-02.pdf]

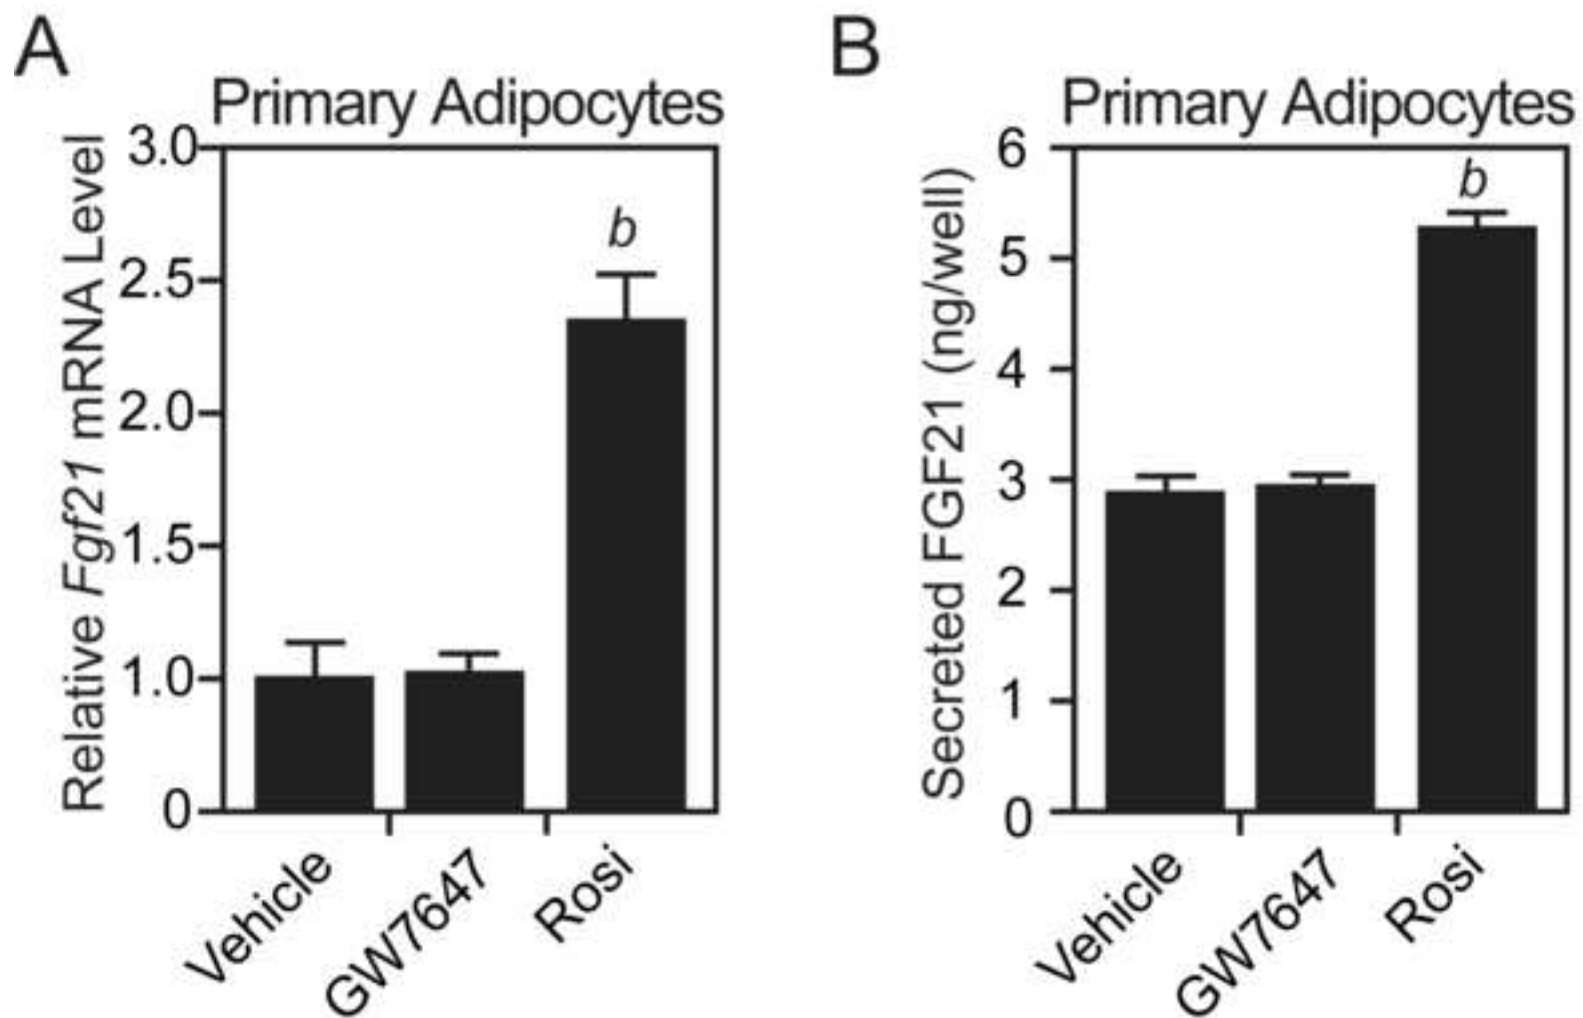

Supplemental Figure S1 to complement Figure 1  
Dutchak et al.

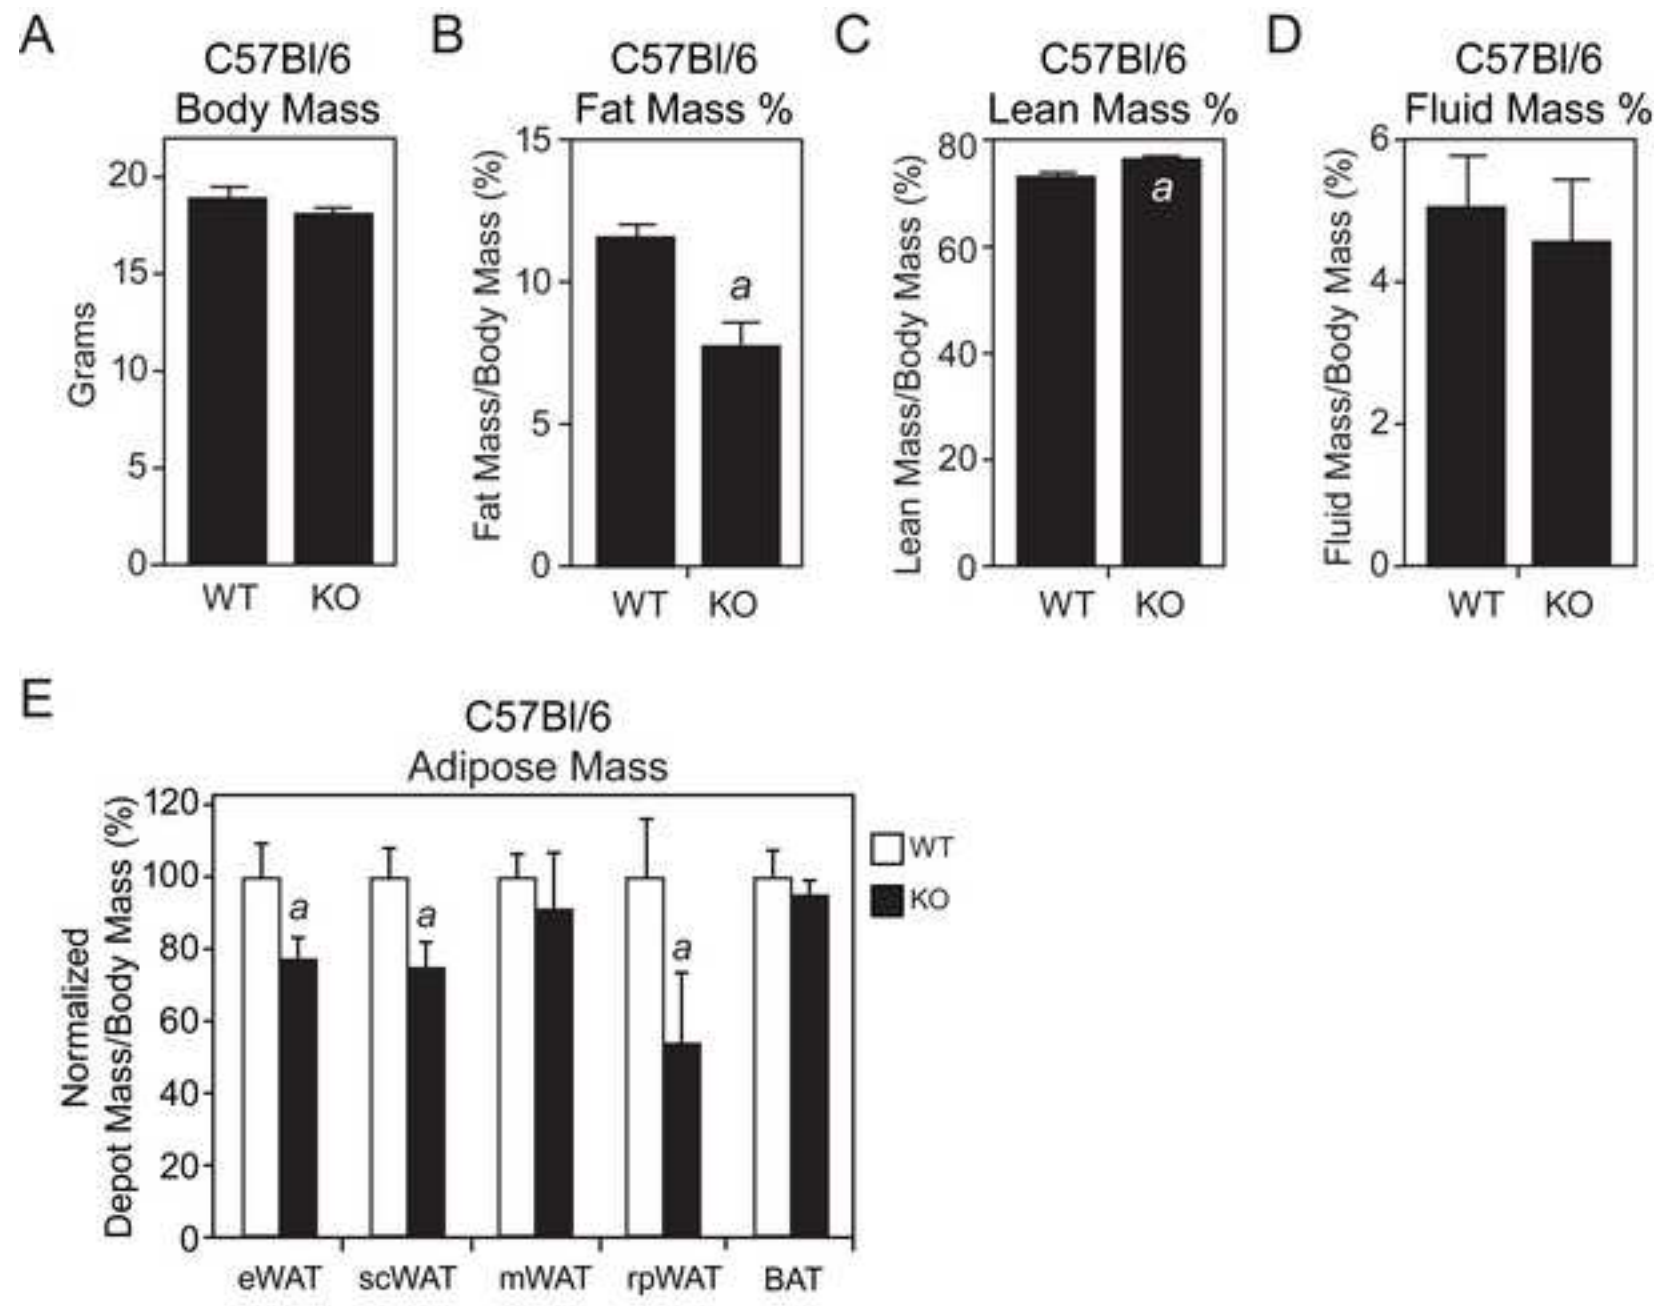

Supplemental Figure S2 to complement Figure 2  
 Dutchak et al.

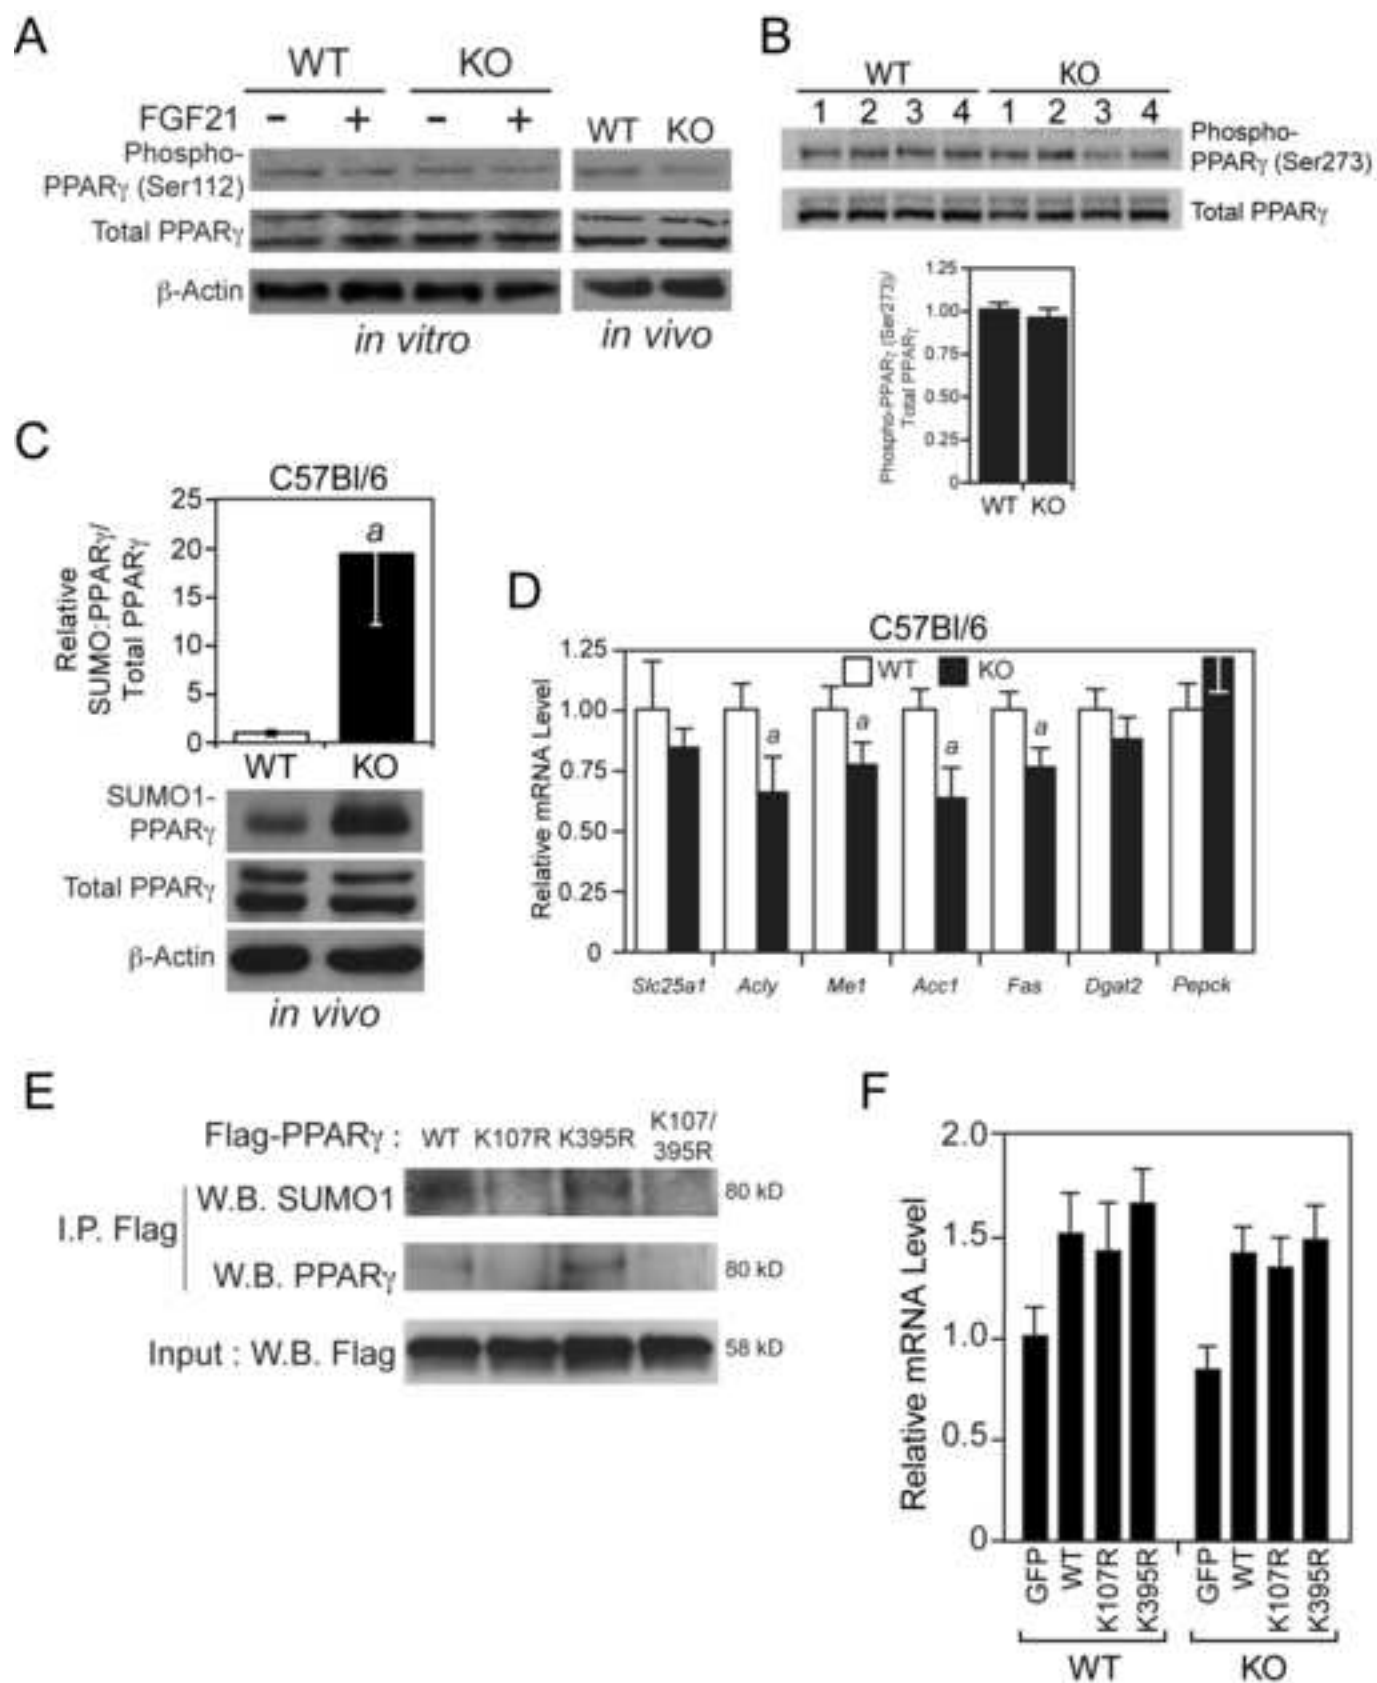

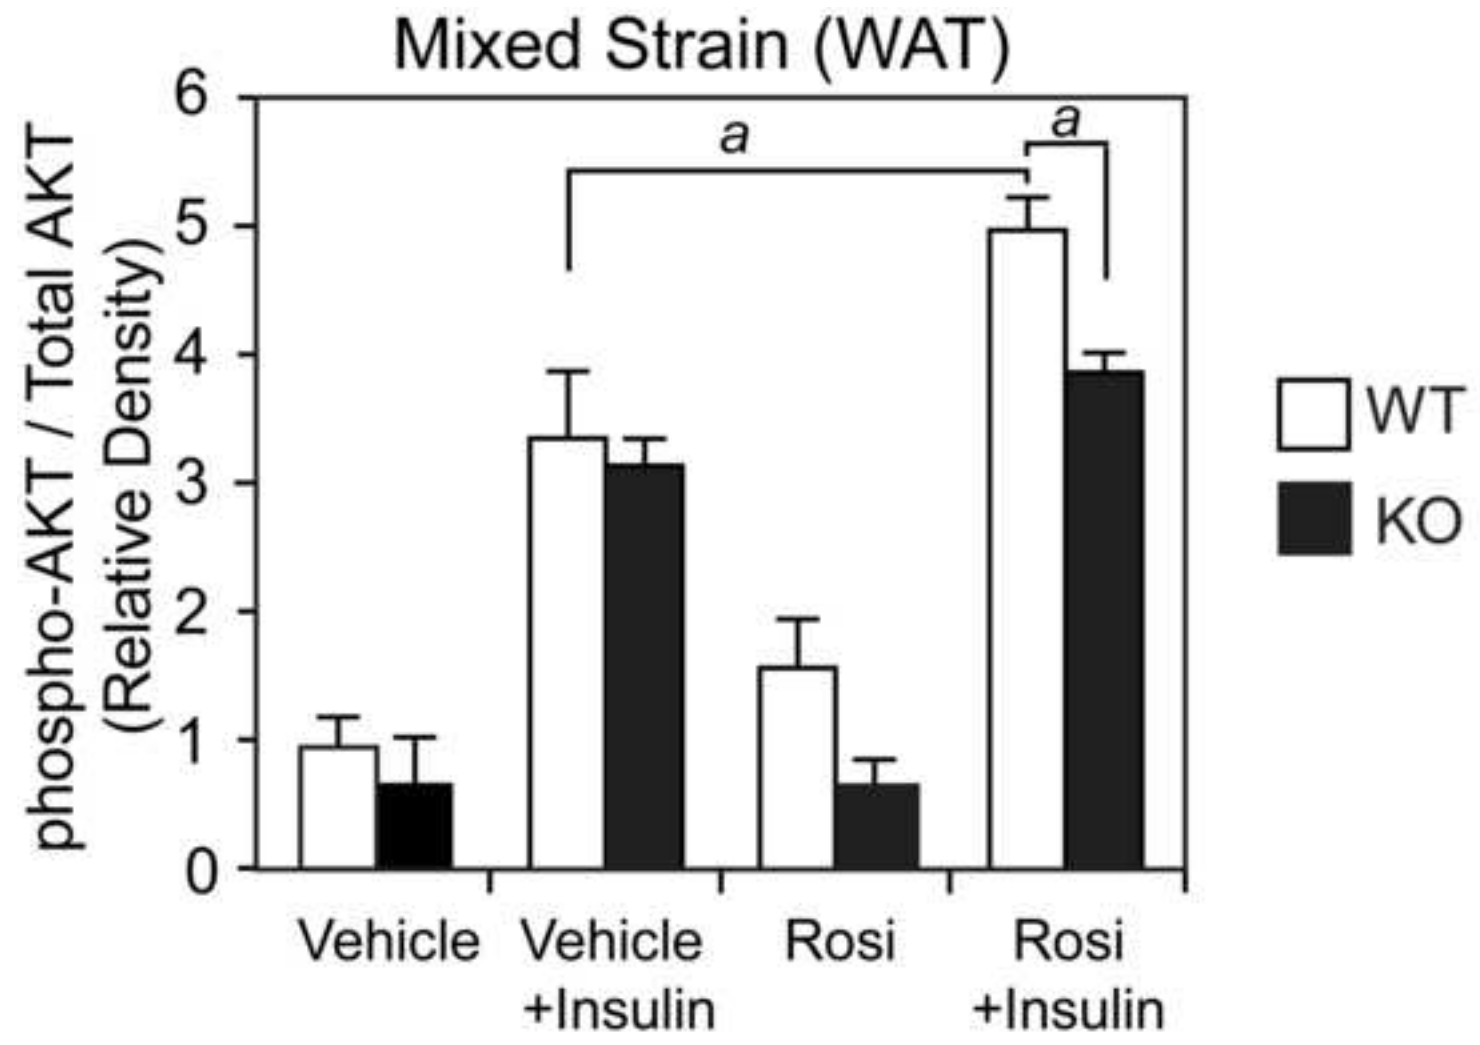

Supplemental Figure S4 to complement Figure 5  
Dutchak et al.
